## **Construction of a bioluminescence-based assay for bitter taste receptors (TAS2Rs)**

Shi Min Tan, Wei-Guang Seetoh\*

Taste Receptors Platform, Singapore Institute of Food and Biotechnology Innovation (SIFBI), Agency for Science, Technology and Research (A\*STAR), 61 Biopolis Drive, Proteos, Singapore 138673

Corresponding author

\*Email: [seetoh\\_wei\\_guang@sifbi.a-star.edu.sg](mailto:seetoh_wei_guang@sifbi.a-star.edu.sg)

### **Abstract**

In humans, a family of 25 bitter taste receptors (TAS2Rs) mediates bitter taste perception. A common approach to characterize bitter causative agents involves expressing TAS2Rs and the appropriate signal transducers in heterologous cell systems, and monitoring changes in the intracellular free calcium levels upon ligand exposure using a fluorescence-based modality. However, a fluorescence-based assay typically suffers from a low signal window, and is susceptible to interference by autofluorescence, therefore limiting its application to screening of plant or food extracts, which are likely to contain autofluorescent compounds. Here, we report the development and validation of a bioluminescence-based intracellular calcium release assay for TAS2Rs that has a better assay performance than a fluorescence-based assay. Furthermore, the bioluminescence-based assay enables the evaluation of TAS2R agonists within an autofluorescent matrix, highlighting its potential utility in the assessment of the bitterness-inducing properties of plant or food fractions by the food industry. Additionally, further improvement to the bioluminescence-based assay for some TAS2Rs was achieved by altering their N-terminal signal sequences, leading to signal window enhancement. Altogether, the bioluminescence-based TAS2R assay can be used to perform functional studies of TAS2Rs, evaluate TAS2R-modulating properties of autofluorescent samples, and facilitate the discovery of compounds that can function as promising bitter taste modulators.

## Introduction

The gustatory system in humans enables the perception of five basic taste sensations (sweet, umami, sour, salty, and bitter) and allows us to assess the nutritive, hedonic, and safety qualities of food and beverages. A class of 25 bitter taste receptors (TAS2Rs) mediates bitter taste perception in humans. TAS2Rs are expressed in Type II taste receptor cells and belong to the G-protein coupled receptor (GPCR) superfamily.<sup>1</sup> However, TAS2Rs have also been identified in extra-oral tissues, such as the heart, lungs, and intestines, which implicate their involvement in various physiological and pathological processes and position some TAS2Rs as potential therapeutic targets.<sup>2</sup> TAS2Rs possess highly diverse coding sequences, sharing 16-84% sequence homology in the transmembrane segments.<sup>3</sup> Furthermore, genetic variation across the human TAS2R repertoire adds complexity to bitter taste perception and shapes individual differences in bitter taste sensitivity and food preferences.<sup>4,5</sup> A bitter tastant can serve as an agonist of several TAS2Rs, and a single TAS2R can bind several structurally diverse bitter ligands.<sup>6-8</sup> Binding of an agonist to a TAS2R induces conformational changes in the receptor, which are transduced by heterotrimeric G-proteins and amplified by second messenger systems to effect cellular responses.

Several techniques can be used to monitor TAS2R activation, but cell-based functional assays that measure events distal to receptor activation (e.g., changes in second messenger levels) are commonly used because amplification of the signaling pathway is involved, which boosts the signal-to-background ratio of the assay. Significant TAS2R studies typically employ an *in vitro* assay system that involves a TAS2R engineered for cell surface expression, and a chimeric G $\alpha$  protein.<sup>7,9,10</sup> Changes in TAS2R activation prompt transient fluctuations in intracellular calcium levels, which can be measured using a fluorescent calcium indicator (e.g., Fluo-4, Calcium 6) whose emission intensity varies in direct proportion to the free calcium concentration. Even though fluorometric analyses have been widely employed in TAS2R assays to identify the functional effects of natural products and synthetic ligands, it is challenging to evaluate the potential bitter modulatory effects of complex biological samples. Extracts and fractionates of plants and food usually contain endogenous, or processing-derived, autofluorescent compounds that will interfere

with the measurement of fluorescence signals, and raise the false positive and false negative hit rates in agonist and antagonist screening campaigns respectively, with subsequent processing of false hits resulting in higher resource consumption.<sup>11</sup>

Alternatively, ligand-induced calcium mobilization may be assessed using calcium-sensitive photoproteins, such as aequorin, clytin, and obelin, which emit bioluminescence upon binding to free calcium ions.<sup>12-14</sup> The active photoprotein complex is reconstituted from the association of coelenterazine, a luminophore, with the apophotoprotein in the presence of molecular oxygen. Binding of calcium ions to the active photoprotein eventuates in oxidative decarboxylation of coelenterazine to coelenteramide, with simultaneous release of carbon dioxide and flash emission of blue light.<sup>15,16</sup> Photoproteins are compelling alternatives to fluorescent probes because bioluminescent responses are not affected by autofluorescence. Importantly, the luminescent intensity is directly commensurate with the free calcium concentration, and photoprotein-based assays have been validated to generate data comparable to those acquired from assays that employ fluorescent indicators.<sup>17-19</sup> Achieving a high signal-to-noise ratio in a bioluminescence-based assay is possible because cells display negligible background autoluminescence. In addition, photoproteins are amenable to recombinant expression, and genetic manipulation for targeting to specific cellular compartments such as the mitochondria to enable them to be more sensitive to changes in the free calcium levels.<sup>20,21</sup> While functional photoprotein-based assays have been developed for various GPCRs, there is however scarce implementation of the photoprotein technology in the field of taste receptors.<sup>22</sup> Hitherto, there has only been one report on the development of a bioluminescence-based assay for the human sweet taste receptor (TAS1R2/TAS1R3) that utilized mitochondrial-targeted (mt)-clytin II as the photoprotein.<sup>19</sup>

Here, we describe the construction of a bioluminescence-based TAS2R assay that is amenable to the screening of TAS2R agonists in an autofluorescent matrix, and has a better assay performance compared to existing fluorescence-based TAS2R assays. Further improvement to the bioluminescence-based assay for some TAS2Rs was accomplished by altering their N-terminal signal sequences, which in turn enhanced the functional expression of TAS2Rs at the plasma membrane. This approach can be readily applied to high-throughput screening assays to facilitate the discovery of

compounds that can function as promising bitter taste modulators, or potential therapeutic agents.

## Results

### Vector construction and selection of the optimal vector type for subsequent studies

Functional TAS2R assays require the proper trafficking of receptors to the plasma membrane, and that TAS2Rs efficiently engage a second messenger system subsequent to ligand binding to produce detectable signals. Our approach to the establishment of a bioluminescence-based intracellular calcium release assay for TAS2Rs in a heterologous mammalian cell system requires three genes to be expressed: i) full-length TAS2R bearing an N-terminal rat somatostatin receptor type 3 (SST<sub>3</sub>) signal sequence to promote receptor translocation to the plasma membrane, ii) G $\alpha$ 16-gust44 chimera for functional coupling of activated TAS2R with phospholipase C activity to eventuate in the release of calcium ions from the endoplasmic reticulum (ER), and iii) mt-clytin II, a mitochondrial-targeted, calcium-binding photoprotein, which reports on TAS2R stimulation by producing bioluminescence upon binding to released calcium ions.

Ensuring heterologous expression of the three genes in a uniform manner is crucial to the development and validation of a biochemical assay for TAS2Rs. The co-transfection of three expression vectors, each encoding a different gene, is expected to be associated with significant drawbacks such as inconsistent co-transfection efficiency, and an inability to achieve a homogenous population of cells that are transfected with all three genes. Co-transfection would result in a heterogeneous population of singly and multiply (e.g. doubly and triply) transfected cells. Furthermore, triply transfected cells may not contain each of the three different plasmids. These disadvantages could potentially result in poor assay reproducibility.

Here, we relied on the approach of generating a single multigene expression plasmid encoding all three genes, with each gene placed under the control of its constitutive promoter, to ensure that transfected cells express the complete ensemble of genes that are necessary for the bioluminescence-based assay to function.<sup>23</sup> Individual expression vectors encoding each of the three genes were constructed, and assembled into a singular plasmid by *in vitro* Cre-*loxP*-mediated recombination. When there is single copy integration of each vector, the recombination reaction yields two

possibilities of a 17 kb plasmid construct, each with a specific pattern of gene assembly, which we assign as type 1 and type 2 (Figure 1a).

Studies of gene positional and orientation effects on protein expression levels in systems using multigene vectors have reported conflicting results. Kriz *et al.*, for instance, observed similar expression levels of three proteins encoded in multigene vectors with different sequence assembly patterns.<sup>23</sup> In contrast, Underhill *et al.*, reported imbalanced protein expression ratios in a dual-gene, single-plasmid system, with higher expression biased towards the gene that is placed downstream of the first.<sup>24</sup> These opposing observations have potentially significant implications for the performance of the bioluminescence-based assay. Therefore, the optimal type of multigene construct to utilize for the assay needs to be empirically determined. Type 1 and type 2 multigene vectors of six TAS2Rs (TAS2R8/10/16/20/38/50) were tested against their cognate agonists. Similar EC<sub>50</sub> values were generated from both type 1 and type 2 plasmids. However, the observation that type 2 plasmids consistently produced overall larger magnitude of responses compared to type 1 plasmids suggests that the former induced an overall higher gene expression (Figure 1b). Henceforth, type 2 multigene constructs were generated for other TAS2Rs and used throughout the study. A variety of potential mechanisms for transcriptional interference arising from the positional effects of genes in the type 1 plasmid could account for its lower gene expression levels, including promoter occlusion, competition for transcription machinery, or creation of antisense RNA that resulted in translational downregulation.<sup>24</sup>

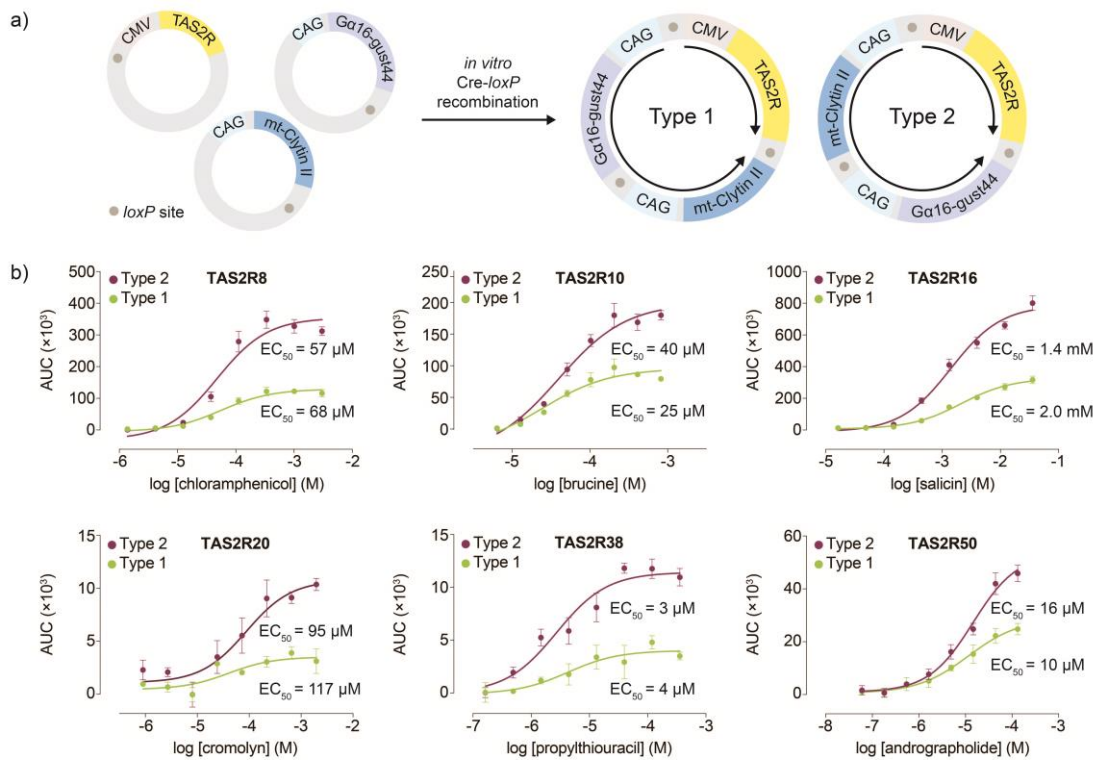

**Figure 1.** Construction of multigene expression vectors and biochemical analysis. a) Assembly of individual expression vectors encoding TAS2R, mt-clytin II, and Gα16-gust44 by *in vitro* Cre-loxP recombination to generate type 1 and type 2 multigene vectors. With TAS2R as the gene of reference, the expression vectors are arranged in the following sequences in clockwise fashion: TAS2R–mt-clytin II–Gα16-gust44 (type 1) and TAS2R–Gα16-gust44–mt-clytin II (type 2). In both type 1 and type 2 plasmids, TAS2R is divergently orientated from mt-clytin II and Gα16-gust44 chimera. Black arrows indicate the direction of expression from the CMV or CAG promoter. Grey circles represent loxP sites. Only relevant elements of the expression constructs are shown for figure clarity. b) Concentration-response curves of TAS2Rs upon stimulation with their cognate agonists in the bioluminescence-based intracellular calcium release assay. Type 2 vectors consistently produced larger assay spans than that of type 1 vectors. Data points are shown as mean ± s.e.m. from a representative experiment out of three independent biological replicates performed in technical quadruplicates. EC<sub>50</sub>, half-maximal effective concentration.

## **Bioluminescence-based intracellular calcium release assay generated larger assay spans than that of a fluorescence-based assay**

The performance difference between the bioluminescence-based and the fluorescence-based assay was evaluated. Using TAS2R50, agonist-induced calcium responses were examined in both assay modalities using the multigene constructs. The kinetics of both bioluminescence and fluorescence intensities showed ligand concentration dependence, and were characterized by an initial rise in light intensity after agonist addition, followed by an eventual decrease (Figure 2). The kinetics of signal decline in the fluorescence-based assay was prolonged because calcium ions dissociate slowly from the fluorescent dye (Figure 2a). However, bioluminescence signals decayed more rapidly than fluorescence signals due to rapid consumption of the coelenterazine substrate upon calcium binding in mt-clytin II (Figure 2b). Despite this difference, similar  $EC_{50}$  values were obtained using both assays by adopting the most appropriate data processing paradigm for each assay (see Methods). A significant advantage of the bioluminescence-based assay is its capability to generate larger assay spans, and therefore deliver higher assay sensitivity and robustness, than fluorescence-based assays (Figure 2). This enhanced sensitivity and large assay window could potentially facilitate the detection and characterization of low potency agonists, partial agonists, and antagonists in screening campaigns with greater confidence. These results indicate that the bioluminescence-based assay is suitable for the detection of TAS2R agonists, and has a markedly higher signal-to-noise ratio (SNR) (defined as mean signal - mean background)/standard deviation of background ( $SNR_{\text{bioluminescence}} = 90$ ) compared to the fluorescence-based assay ( $SNR_{\text{fluorescence}} = 15$ ).



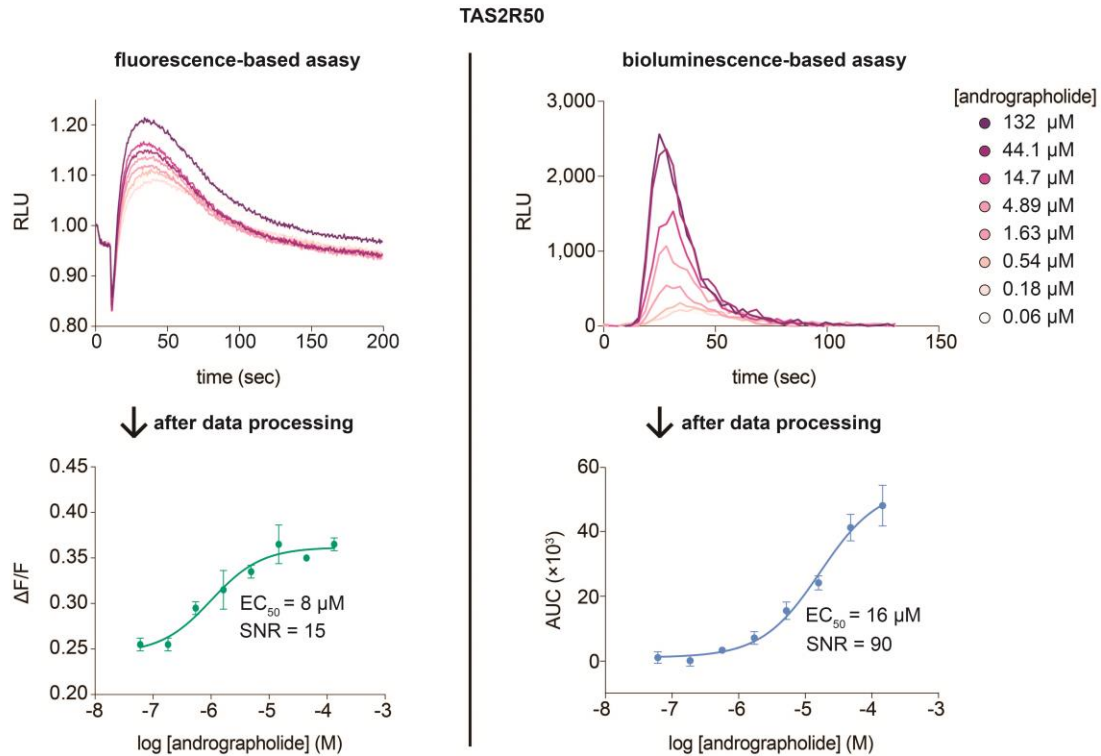

**Figure 2.** Cells expressing TAS2R50 were loaded with the Fluo4 and coelenterazine for the fluorescence-based and bioluminescence-based assay, respectively, and the emission signals were recorded as a function of time after agonist introduction. Both assay modalities displayed concentration-dependent responses, but the kinetics of signal decay was more rapid for the bioluminescence-based assay compared to the fluorescence-based assay. After data processing of the raw data, the bioluminescence-based assay produced a larger signal-to-noise ratio than that of the fluorescence-based assay. Data points are shown as mean  $\pm$  s.e.m. from a representative experiment out of at least two independent biological replicates performed in technical quadruplicates.  $EC_{50}$ , half-maximal effective concentration. SNR, signal-to-noise ratio.

## **Validation of the bioluminescence-based TAS2R assay**

The bioluminescence-based assay was used to characterize the functional properties of various human TAS2Rs. For each TAS2R, one or more of its cognate agonists were tested against either the AD-293 or 293AD cell line, or both. Both cell lines were used because of their stronger adherent properties, which facilitate media changes on the day of the FLIPR assay. However, because both cell lines are generated differently, some disparities in gene expression capacities due to a myriad of factors could be reasonably expected. Consequently, some TAS2Rs may be well expressed in one cell line but not the other, and this needs to be empirically evaluated. In general, the EC<sub>50</sub> values obtained from the bioluminescence-based assay were comparable to those reported in the literature (Figure 3, Supplementary Figure 1, and Table 1). However, deviations between our experimental and published potency values for some ligands (i.e. TAS2R4: stevioside; TAS2R7: Mg<sup>2+</sup>, Mn<sup>2+</sup>, Zn<sup>2+</sup>) were observed, which could be attributed to the use of a different assay format, readout and processing parameters, use of different cell lines with resultant potential differences in TAS2R expression levels, and quality and methodological differences in ligand preparations. Calcium responses induced by the tested cognate agonists reflected specific TAS2R stimulation. Non-specific activation of endogenous GPCRs, calcium channels, or cellular effectors was discounted because cells in our control conditions (i.e. transfected to express both Gα16-gust44 and mt-clytin II, or solely mt-clytin II) produced negligible calcium responses, or responses that resulted in partial dose-response curves, indicating extremely weak potency of the ligands when challenged with TAS2R agonists (Supplementary Table 1 and Supplementary Figure 2). Furthermore, the assay can be used to evaluate the E<sub>max</sub> of various ligands and classify ligands as full agonists or partial agonists. For instance, in the concentration response curve for TAS2R43, both aristolochic acid and aloin could be considered full agonists, with the former being more potent than the latter. However, caffeine did not engender a 100% response level as that of aristolochic acid and aloin even at the highest concentration tested, thereby indicating its partial agonist activity towards TAS2R43 (Figure 3).

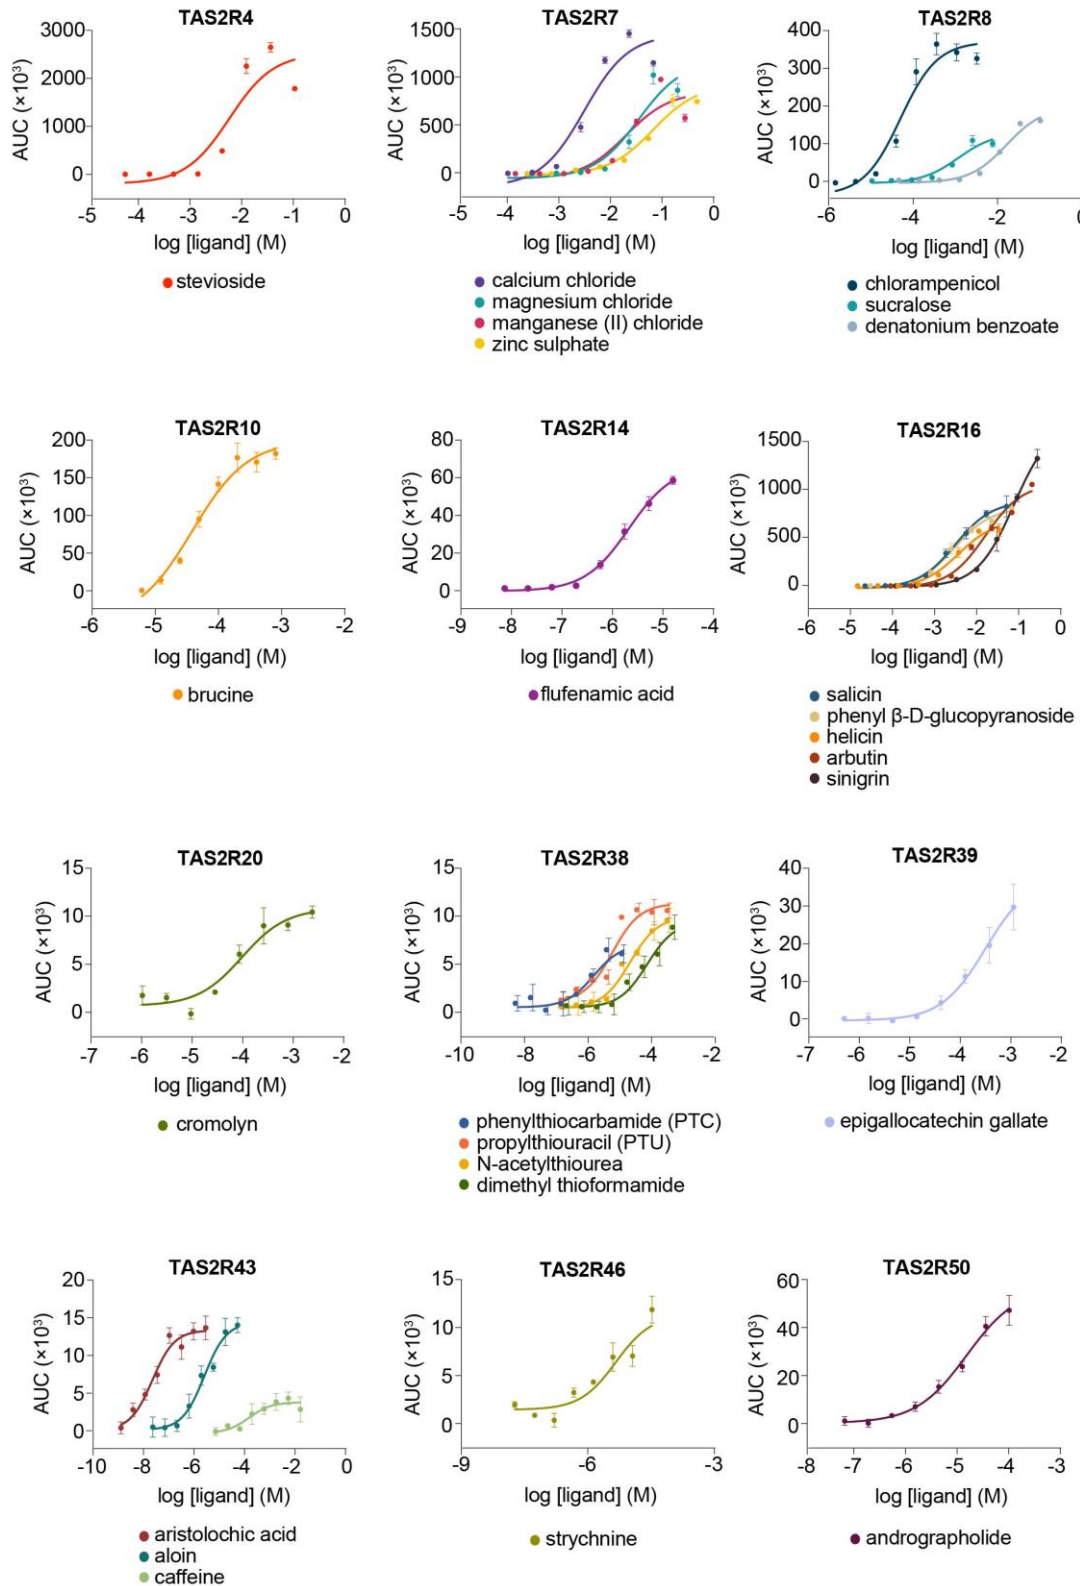

**Figure 3.** Concentration-response curves of TAS2Rs upon stimulation with their cognate agonists in the bioluminescence-based intracellular calcium release assay in AD-293 cells. Data points are shown as mean  $\pm$  s.e.m. from a representative

experiment out of at least two independent biological replicates performed in at least technical duplicates.

**Table 1.** EC<sub>50</sub> values of TAS2R agonists. Values indicate the mean ± s.e.m. (n = 2-4).

| Bitter Receptor | Compound                 | EC <sub>50</sub> values |                | Published EC <sub>50</sub> values                                            |
|-----------------|--------------------------|-------------------------|----------------|------------------------------------------------------------------------------|
|                 |                          | 293AD                   | AD-293         |                                                                              |
| TAS2R3          | Chloroquine diphosphate  | 45 ± 14 µM              | -              | 172 ± 29 µM <sup>7</sup>                                                     |
| TAS2R4          | Stevioside               | 7 ± 2 mM                | 7 ± 3 mM       | 341 ± 34 µM <sup>25</sup>                                                    |
| TAS2R5          | Epigallocatechin gallate | 47 ± 11 µM              | -              | 12.3 ± 3.63 µM <sup>26</sup>                                                 |
| TAS2R7          | Calcium chloride         | 5 ± 0.5 mM              | 4 ± 1 mM       | 5.27 ± 0.5 mM <sup>27</sup>                                                  |
|                 | Magnesium chloride       | -                       | 75 ± 9 mM      | 6.07 ± 1.07 mM <sup>27</sup><br>10 ± 19.6 mM <sup>28</sup>                   |
|                 | Zinc sulphate            | -                       | 83 ± 11 mM     | 33.36 ± 0.14 mM <sup>27</sup>                                                |
|                 | Manganese (II) chloride  | -                       | 28 ± 5 mM      | 6.59 ± 1.73 mM <sup>27</sup><br>10 ± 1.7 mM <sup>28</sup>                    |
| TAS2R8          | Chloramphenicol          | 18 ± 2.7 µM             | 70 ± 12 µM     | 41 µM <sup>29</sup>                                                          |
|                 | Denatonium benzoate      | -                       | 1 ± 0.1 mM     | -                                                                            |
|                 | Sucralose                | -                       | 11 ± 4 mM      | -                                                                            |
| TAS2R9          | Pirenzepine              | 4 ± 0.4 mM              | -              | 1.8 mM <sup>30</sup>                                                         |
| TAS2R10         | Brucine                  | 21 ± 6.5 µM             | 42 ± 3 µM      | -                                                                            |
| TAS2R13         | Oxyphenonium             | 161 ± 16 µM             | -              | -                                                                            |
| TAS2R14         | Flufenamic acid          | 422 ± 96 nM             | 1,490 ± 481 nM | 137 ± 17 nM <sup>7</sup><br>238 ± 12.9 nM <sup>31</sup>                      |
|                 | Aristolochic acid        | 2.2 ± 1 µM              | -              | -                                                                            |
|                 | Picrotoxinin             | 54 ± 8.4 µM             | -              | 2.6 µM <sup>32</sup><br>13.16 ± 0.93 µM <sup>33</sup><br>18 µM <sup>34</sup> |

|         |                                   |                       |                     |                                                                                                                                                                               |
|---------|-----------------------------------|-----------------------|---------------------|-------------------------------------------------------------------------------------------------------------------------------------------------------------------------------|
| TAS2R16 | Salicin                           | $0.4 \pm 0.2$ mM      | $2 \pm 0.6$ mM      | $0.8 \pm 0.2$ mM <sup>35</sup><br>$1.4 \pm 0.2$ mM <sup>7,36</sup><br>$1.1$ mM <sup>37</sup><br>$0.417$ mM <sup>38</sup><br>$1.2$ mM <sup>39</sup><br>$0.22$ mM <sup>40</sup> |
|         | Helicin                           | -                     | $3 \pm 0.2$ mM      | $2.3 \pm 0.4$ mM <sup>7,36</sup>                                                                                                                                              |
|         | Arbutin                           | -                     | $5 \pm 1.2$ mM      | $5.5 \pm 1.9$ mM <sup>35</sup><br>$5.8 \pm 0.9$ mM <sup>7,36</sup><br>$1.34$ mM <sup>40</sup>                                                                                 |
|         | Sinigrin                          | -                     | $70 \pm 18$ mM      | $0.23$ mM <sup>41</sup>                                                                                                                                                       |
|         | Phenyl $\beta$ -D-glucopyranoside | -                     | $2 \pm 0.1$ mM      | $1.1 \pm 0.1$ mM <sup>36</sup><br>$0.38$ mM <sup>40</sup>                                                                                                                     |
| TAS2R20 | Cromolyn                          | $35 \pm 7$ $\mu$ M    | $73 \pm 26$ $\mu$ M | $45 \pm 25$ $\mu$ M <sup>7</sup><br>$64.37 \pm 13$ $\mu$ M <sup>42</sup>                                                                                                      |
| TAS2R30 | Amarogentin                       | $3 \pm 1$ $\mu$ M     | -                   | -                                                                                                                                                                             |
| TAS2R31 | Aristolochic acid                 | $186 \pm 70$ nM       | -                   | $455 \pm 5.3$ nM <sup>7,43</sup><br>$130 \pm 10$ nM <sup>44</sup><br>$240$ nM (WMVI) <sup>45</sup><br>$810$ nM (RLAV) <sup>45</sup>                                           |
| TAS2R38 | Propylthiouracil                  | $0.9 \pm 0.3$ $\mu$ M | $6 \pm 2$ $\mu$ M   | $2.1 \pm 0.9$ $\mu$ M <sup>7</sup><br>$1.5$ $\mu$ M <sup>46</sup><br>$2.2$ $\mu$ M <sup>47</sup>                                                                              |
|         | Phenylthiocarbamide               | -                     | $2 \pm 0.4$ $\mu$ M | $1.1 \pm 0.5$ $\mu$ M <sup>7</sup><br>$6$ $\mu$ M <sup>39</sup><br>$4.5$ $\mu$ M <sup>46</sup><br>$2.3$ $\mu$ M <sup>47</sup>                                                 |
|         | N-acetylthiourea                  | -                     | $16 \pm 8$ $\mu$ M  | $25 \pm 16$ $\mu$ M <sup>7</sup>                                                                                                                                              |
|         | Dimethyl thioformamide            | -                     | $79 \pm 12$ $\mu$ M | $59 \pm 17$ $\mu$ M <sup>7</sup>                                                                                                                                              |

|         |                          |             |                |                                                                                                        |
|---------|--------------------------|-------------|----------------|--------------------------------------------------------------------------------------------------------|
| TAS2R39 | Epigallocatechin gallate | 141 ± 44 μM | 362 ± 81 μM    | 8.50 ± 2.84 μM <sup>26</sup><br>112 μM <sup>48</sup><br>161 μM <sup>49</sup><br>181.6 μM <sup>50</sup> |
| TAS2R43 | Aristolochic acid        | 20 ± 4 nM   | 26 ± 3 nM      | 8 nM <sup>45</sup><br>81 ± 0.8 nM <sup>7</sup>                                                         |
|         | Aloin                    | -           | 5 ± 3 μM       | 1.2 μM <sup>45</sup><br>2.8 ± 0.4 μM <sup>7</sup><br>35 μM <sup>47</sup>                               |
|         | Caffeine                 | -           | 0.39 ± 0.12 mM | 0.94 ± 0.14 mM <sup>51</sup>                                                                           |
| TAS2R46 | Strychnine               | 309 ± 73 nM | 1,201 ± 433 nM | 0.39 ± 0.08 μM <sup>6</sup><br>0.43 ± 0.02 μM <sup>8,52</sup><br>3.47 μM <sup>53</sup>                 |
| TAS2R50 | Andrographolide          | 2 ± 0.3 μM  | 16 ± 3 μM      | 22.9 ± 4.9 μM <sup>7</sup>                                                                             |

### **The bioluminescence-based assay enables evaluation of TAS2R agonists within an autofluorescent matrix**

The generation of bioluminescent signals does not require an excitation light source and is free from interference by autofluorescence, potentially allowing complex biological samples that contain autofluorescent compounds to be screened. To evaluate the possibility of screening autofluorescent samples in the bioluminescence-based assay, agonist solutions were prepared by dilution in Luria-Bertani (LB) broth, a complex medium that displays autofluorescence when excited with blue light due to the presence of compounds such as flavin, and tested against TASR50 in both the fluorescence- and bioluminescence-based assays. In the fluorescence-based assay, concentration-dependent cellular responses could only be observed when andrographolide was dissolved in a non-autofluorescent medium like Hanks' Balanced Salt Solution (HBSS) (Figure 4a). The use of andrographolide dissolved in LB medium generated uniformly high fluorescent signals, effectively masked the cellular responses to the cognate agonists, and prevented the generation of dose-response curves (Figure 4a). In contrast, dose-dependent cellular responses of andrographolide prepared in LB medium could be detected in the bioluminescence-based assay, and the EC<sub>50</sub> value obtained was in good agreement with that obtained from testing andrographolide dissolved in HBSS (Figure 4b and Table 1). Interestingly, the signal-to-noise ratio of the assay is higher in the complex LB medium compared to HBSS buffer, suggesting the presence of TAS2R50 ligands in LB medium that contribute to the overall higher functional responses. These results indicated that the bioluminescence-based assay is potentially amenable to the screening and testing of samples within an autofluorescent matrix.



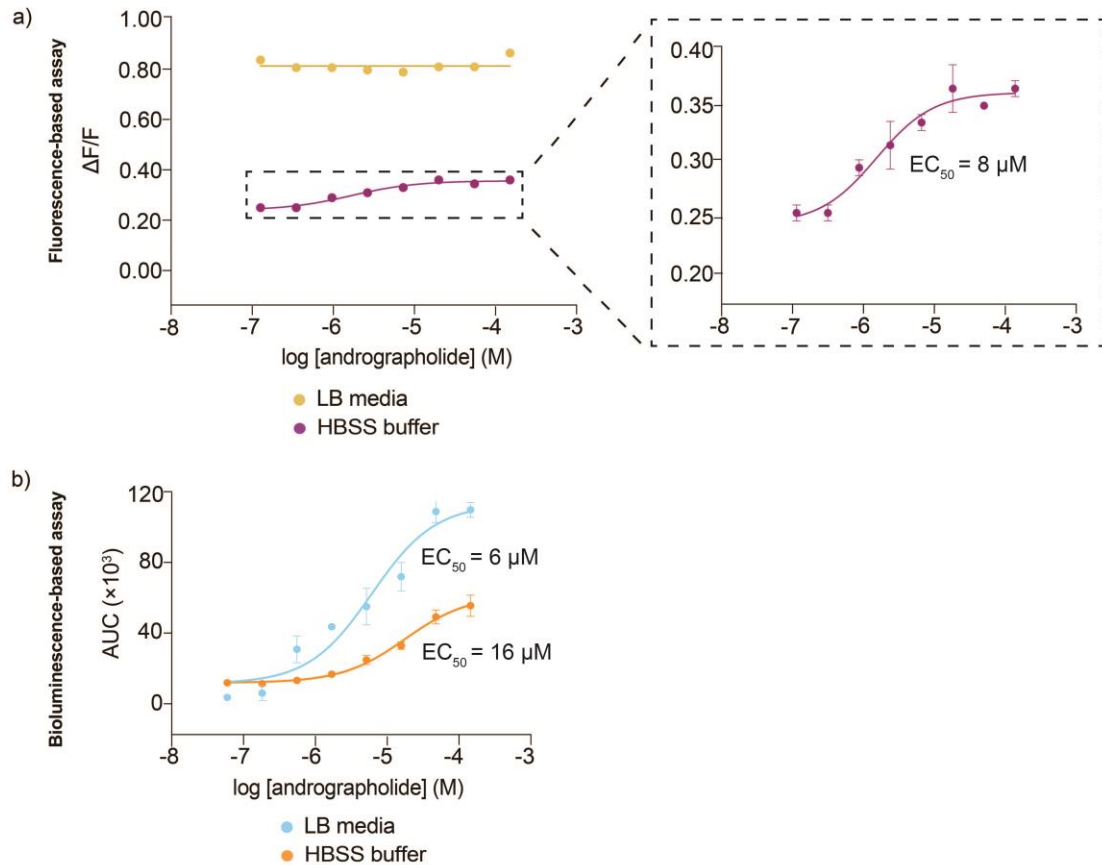

**Figure 4.** Dose-response curve of TAS2R50 in response to andrographolide stimulation when dissolved in different media. a) Andrographolide dissolved in LB medium produced uniformly high fluorescence signals. When andrographolide was dissolved in HBSS buffer, a clear dose-response curve could be discerned, with an inset showing an enlarged view of the functional response curve. b) Concentration-response curve of TAS2R50 upon stimulation by andrographolide dissolved in LB and HBSS buffer obtained from the bioluminescence-based assay. Data points are shown as mean  $\pm$  s.e.m. from a representative experiment out of at least two independent biological replicates performed in technical quadruplicates.  $EC_{50}$ , half-maximal effective concentration.

## Screening of signal sequences to enhance functional bioluminescent readout of TAS2Rs

The observation that the SST<sub>3</sub> signal sequence produced different assay spans for different TAS2Rs in the bioluminescence-based assay suggested that its ability to mediate receptor surface expression varied with the identity of the TAS2R. Given that GPCRs constitute a vast protein family, we speculate that some TAS2Rs could exhibit higher cell surface expression when grafted with putative signal sequences of other GPCRs to produce larger assay spans in the bioluminescence-based calcium assay. Hence, a cell surface expression assay was developed based on the NanoBiT technology. TAS2R constructs incorporating an N-terminal signal sequence followed by a HiBiT tag, an 11-amino acid tag (VSGWRLFKKIS), were generated and transfected into AD-293. Plasma-membrane localized TAS2Rs will display the HiBiT tag extracellularly, enabling it to form a highly luminescent enzyme when incubated with a non-lytic reagent containing LgBiT protein, which binds with high affinity ( $K_D = 0.7$  nM) to the HiBiT tag, and furimazine substrate.<sup>54</sup> The luminescence level generated after addition of the reagent is directly proportional to the cell surface expression level of the HiBiT-tagged TAS2R. Accordingly, signal sequences that are more effective at promoting TAS2R translocation to the plasma membrane will generate higher luminescence signals (Figure 5a).

Putative signal sequences from 55 randomly selected, non-olfactory Class A GPCRs, which share up to 29% sequence homology with TAS2Rs in the transmembrane domains, were tested for their effect on cell surface expression of HiBiT-tagged TAS2Rs.<sup>3</sup> This approach was applied to three TAS2Rs (TAS2R20/38/50) that showed relatively small signal spans in the bioluminescence-based intracellular calcium release assay. Results from the cell surface expression assay showed that the signal sequence of muscarinic acetylcholine M<sub>3</sub> receptor (M<sub>3</sub>) caused the highest degree of plasma membrane translocation of TAS2R20/38/50 (Figure 5b). Consequently, type 2 multigene vectors containing the respective M<sub>3</sub>-TAS2Rs were generated and profiled using their cognate agonists to determine whether increased receptor trafficking to the plasma membrane translated to augmented signaling responses in the bioluminescence-based calcium assay. Concentration-response relationships revealed similar EC<sub>50</sub> values were obtained using both M<sub>3</sub>-TAS2Rs and SST<sub>3</sub>-TAS2Rs, indicating that N-terminal alteration of TAS2Rs did not affect receptor-ligand

interactions and functional responses. More importantly, the dose-response curves demonstrated overall more pronounced response magnitudes, with a 2- to 3-fold increase in signal window being observed, from using M<sub>3</sub>-TAS2Rs than SST<sub>3</sub>-TAS2Rs, suggesting that the M<sub>3</sub> sequence facilitated greater export of functional TAS2Rs to the cell surface than the SST<sub>3</sub> tag (Figure 5c).

Various studies have highlighted the role of signal sequence *N*-glycosylation in the trafficking of GPCRs to the cell surface. To probe the importance of glycosylation in mediating the transport of TAS2Rs to the cell surface, asparagine residues within the M<sub>3</sub> and SST<sub>3</sub> signal sequences (without HiBiT tag) were mutated to alanine in order to probe the effect of signal sequence *N*-glycosylation on functional expression of TAS2R20/38/50 in the bioluminescence-based assay. Receptors TAS2R20/38/50 which were grafted with *N*-glycosylation-deficient signal sequences [M<sub>3</sub>(Asn→Ala)-TAS2R and SST<sub>3</sub>(Asn→Ala)-TAS2R] did not evoke cellular responses upon application of their cognate agonists, suggesting a failure of receptor transport to the plasma membrane and intracellular trapping of these TAS2Rs (Figure 6).

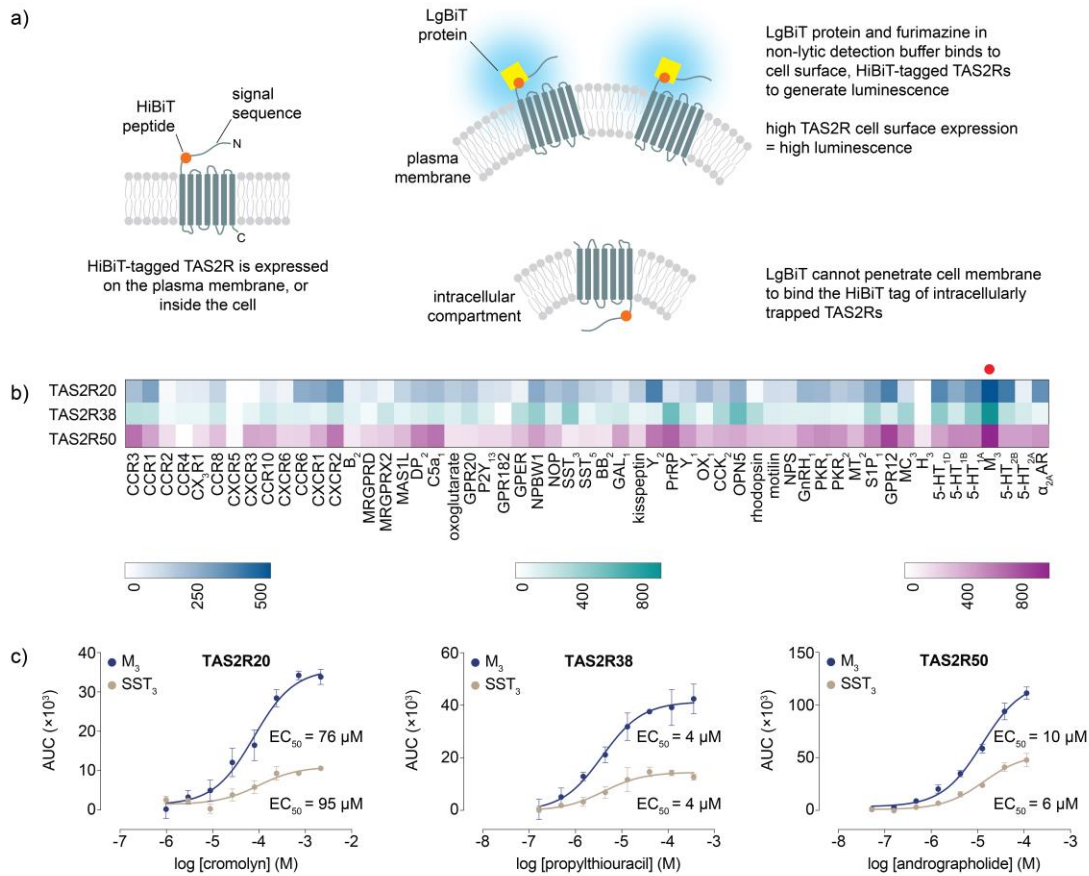

**Figure 5.** Screening of signal sequences to increase functional expression of TAS2R20/38/50 at the plasma membrane. a) Schematic of the design and principles of the cell surface expression HiBiT assay. b) Heat map of the fold increase in luminescence signals of TAS2R20/38/50 tagged with various N-terminal signal sequences compared with untransfected cells. The signal sequence derived from the M<sub>3</sub> receptor, indicated by a red circle, generated the highest surface TAS2R expression for TAS2R20/38/50. c) Concentration-response curves of TAS2R20/38/50 upon stimulation with their cognate agonists in the bioluminescence-based intracellular calcium release assay. M<sub>3</sub>-TAS2Rs had higher overall magnitude of responses compared to SST<sub>3</sub>-TAS2Rs. The identities of GPCRs used for screening are abbreviated according to the nomenclature employed by the IUPHAR/BPS Concise Guide to Pharmacology (<http://www.guidetopharmacology.org>). Adrenergic receptor is abbreviated to AR for simplicity. Data points are shown as mean  $\pm$  s.e.m. from a representative experiment out of three independent biological replicates performed in technical quadruplicates. EC<sub>50</sub>, half-maximal effective concentration.

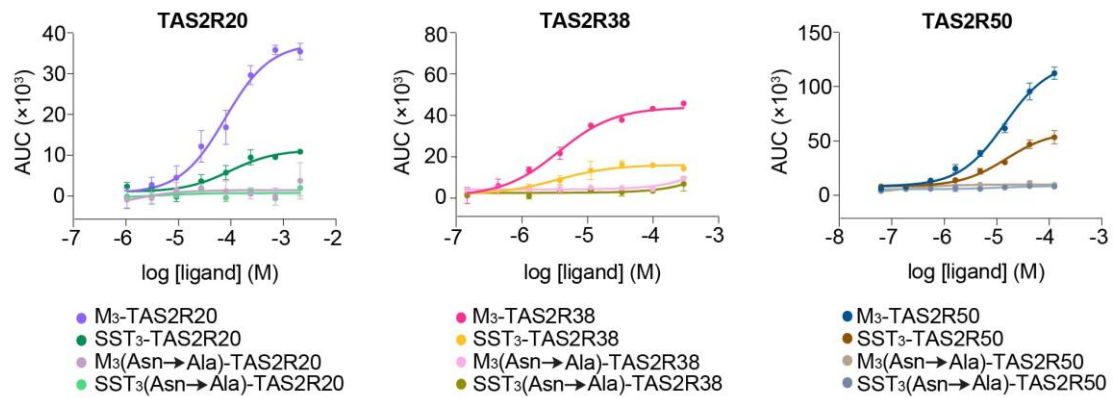

**Figure 6.** Effect of *N*-glycosylation competent or deficient M<sub>3</sub> and SST<sub>3</sub> signal sequences on the functional responses of correspondingly tagged TAS2R20/38/50 upon stimulation by their cognate agonists. TAS2R20/38/50 grafted with *N*-glycosylation-deficient M<sub>3</sub> and SST<sub>3</sub> signal sequences were resistant to activation by their cognate agonists. Data points are shown as mean ± s.e.m. from a representative experiment out of three independent biological replicates performed in technical quadruplicates.

## Discussion

Heterologously expressed TAS2Rs suffer from poor cell surface expression as non-native cells may be deficient in the appropriate cofactors or trafficking apparatus for folding and exporting TAS2Rs to the plasma membrane. Poor localization of TAS2Rs to the cell surface in heterologous systems is associated with diminished receptor signaling output and functionality. One of the more commonly used strategies to enhance the density of TAS2Rs at the cell surface involves fusing an N-terminal signal sequence of either the SST<sub>3</sub>, or Rho receptor to the TAS2R. We adopted this approach, specifically co-expressing SST<sub>3</sub>-TAS2R with Gα16-gust44 chimera and mt-clytin II, to develop and validate a bioluminescence-based TAS2R intracellular calcium release assay. The bioluminescence TAS2R assay produced greater assay spans than that of fluorescence-based assays. This is largely attributed to the utilization of mt-clytin II as the calcium reporter. Calcium-binding photoproteins in general are useful reporters for studying calcium-mediated signaling processes. The mt-clytin II-coelenterazine complex displays negligible basal luminescence, and responds almost immediately to calcium binding by emitting a flash luminescence, followed by an exponential decay due to consumption of the coelenterazine substrate.<sup>13</sup> Its fast calcium binding and dissociation kinetics render it a suitable indicator to report on swift, transient changes in calcium ion concentration and study rapid receptor-ligand interactions. Mitochondrial targeting of clytin II is crucial to generating higher luminescence intensity than that of cytosol-localized clytin II, as inositol 1,4,5-triphosphate (IP<sub>3</sub>)-induced calcium release from the ER subsequent to ligand activation is thought to result in the formation of ER-proximal, calcium-rich microdomains that enables the closely apposed mitochondria to sense a higher initial rise in calcium concentration than would be experienced by the bulk cytosol.<sup>20,21</sup> Furthermore, while other calcium-sensitive photoproteins could be employed, mt-clytin II was chosen as it has been shown to generate higher luminescence intensity and a more favorable signal-to-noise ratio in the assay than that of mt-aequorin, mt-clytin, and mt-obelin.<sup>19</sup>

An additional advantage that stems from using a photoprotein reporter is the ability to screen samples that contain autofluorescent substances, which is a common characteristic of plant and food extracts or fractionates. We have demonstrated that the bioluminescence-based assay was able to detect agonist-induced increase in

calcium mobilization in a concentration-dependent fashion even when the ligands were dissolved in LB, an autofluorescent media. This potentially enables the bioluminescence assay to be applied to the screening of plant or food extracts, and could find potential application in the discovery of bitter taste modulators for the food industry.

Another strategy that has been reported to increase the density of TAS2Rs at the plasma membrane involves co-expressing TAS2Rs with accessory factors such as receptor transporting proteins (RTPs), and receptor expression enhancing proteins (REEPs), which have been reported to increase the functional expression of heterologously expressed odorant receptors (ORs) by several probable mechanisms that include assisting in proper folding of ORs, promoting cell surface transport of OR-containing compartments, and serving as coreceptors of ORs by providing appropriate trafficking signals or masking potential OR retention motifs.<sup>41,55</sup> However, this method is not widely employed in TAS2R studies probably because the effects of RTPs and REEPs on TAS2R function appeared to be receptor-specific.<sup>56</sup>

As mentioned previously, the more frequently utilized strategy involves tagging TAS2Rs with either the SST<sub>3</sub> or Rho signal sequence (referred to as SST<sub>3</sub>-TAS2R or Rho-TAS2R). The amplitude of signaling responses in calcium assays was greater by using signal sequence-tagged TAS2Rs than by co-expression of accessory proteins, suggesting that the former elicited higher functional receptor expression at the plasma membrane, and provided a motivation to screen other putative signal sequences from various non-olfactory, class A GPCRs to explore whether this approach can improve assay functional readout in the bioluminescence-based assay by improving TAS2R cell surface expression.<sup>56</sup> The extracellular N-termini of TAS2Rs are predicted to be generally short, span 1-30 amino acid residues, and are devoid of signal peptide sequences and *N*-glycosylation sites (Supplementary Table 2). While the approach of incorporating N-terminal sequences to improve receptor cell surface trafficking has been applied to various GPCRs, we only note that hitherto only signal sequences from the SST<sub>3</sub> and Rho receptors have been employed for TAS2R studies.<sup>57</sup> We were further interested in exploring the effect of changing the N-terminal signal sequences of TAS2Rs to that of other GPCRs on the functional readout of the bioluminescence-based TAS2R assay. Therefore, we selected 3 TAS2Rs (TAS2R20/38/50), which

have relatively low signal windows using SST3 tag, as test cases by investigating the effect of attaching various putative signal sequences from 55 Class A, non-olfactory GPCRs on the functional readout. The screen revealed that these 3 receptors coincidentally had higher overall magnitude of responses when tagged with the signal sequence from the M<sub>3</sub> receptor.

*N*-glycosylation of GPCRs is a ubiquitous type of post-translational modification that performs diverse receptor-specific roles, including functions in cell surface expression, protein folding, structural maturation, oligomerization, ligand recognition, and coupling to signal transduction systems.<sup>58–64</sup> The SST<sub>3</sub> and M<sub>3</sub> export tags contain 2 (N18 and N31) and 5 (N6, N15, N41, N48, and N52) potential *N*-glycosylation sites in their protein sequences, respectively. The ablation of one *N*-glycosylation site on the N-terminus of an OR impeded its translocation to the plasma membrane, suggesting the importance of N-terminal *N*-glycans for proper functioning and localization of chemosensory receptors.<sup>65</sup> Similar positional effects of *N*-glycans on cell surface expression have also been observed for some Class A GPCRs, such as the β<sub>1</sub> adrenergic receptor, bradykinin receptor, and dopamine receptor, whereby disruption of receptor *N*-glycosylation inhibited their translocation to the plasma membrane.<sup>61,66,67</sup> In a heterologous system that lacks potentially specialized folding or trafficking machinery in taste receptor cells, the presence of artificially introduced *N*-glycans may assist in proper TAS2R folding by engaging glycoprotein-dedicated chaperone systems that involve calnexin, calreticulin, and binding immunoglobulin protein (BiP).<sup>68,69</sup> In addition, *N*-glycosylation may enhance TAS2R export to the cell surface by favoring receptor accumulation in lipid rafts, or promoting interactions with signaling compartments involved in receptor trafficking.<sup>70</sup>

Compared with the SST<sub>3</sub> export tag, the introduction of more *N*-glycosylation sites to the protein sequences of TAS2R20/38/50 by using the M<sub>3</sub> signal sequence may further enhance TAS2R cell surface expression by improving receptor folding, or by better overcoming potential inhibitions on receptor transportation to the plasma membrane imposed by protein motifs, or domains specific to these three TAS2Rs, which we were unable to identify. This implies that the cell surface trafficking of some TAS2Rs in a heterologous cell system may depend on the extent of *N*-glycosylation. In fact, individual TAS2Rs, and even other chemoreceptors, have



different requirements for auxiliary factors in relation to cell surface trafficking, suggesting that the ease of functional expression of each TAS2R is linked to its identity or protein sequence, and that some TAS2Rs may face an intrinsically greater obstacle to be expressed and exported. This was exemplified by the recalcitrance of native TAS2R10/38 to ligand activation despite RTP and REEP coexpression, reflecting a failure in receptor surface expression, in contrast to the independence of wild type TAS2R14/43, which exhibited similar agonist-mediated signaling responses regardless of the presence of accessory proteins.<sup>56</sup> Further studies will be needed to elucidate the mechanisms of the M<sub>3</sub> signal sequence in inducing greater magnitude of responses, and whether this effect could be extended to other TAS2Rs or GPCRs.

## Methods and Materials

### Materials

All compounds were purchased from commercial sources. Denatonium benzoate, dimethyl thioformamide, epigallocatechin gallate, N-acetylthiourea, phenylthiocarbamide, phenyl  $\beta$ -D-glucopyranoside, picrotoxinin, sinigrin, stevioside were purchased from Tokyo Chemical Industry. Aloin, andrographolide, aristolochic acid, cromolyn sodium, flufenamic acid, oxyphenonium bromide, propylthiouracil, salicin were purchased from Cayman Chemical. Arbutin, brucine sulfate heptahydrate, caffeine, chloramphenicol, chloroquine diphosphate, helicin, magnesium chloride hexahydrate, manganese (II) chloride tetrahydrate, strychnine, sucralose, zinc sulfate heptahydrate were purchased from Sigma-Aldrich. Amarogentin was purchase from MedChemExpress. Calcium chloride dihydrate was purchased from Kanto Kagaku. Restriction enzymes and Cre recombinase were purchased from New England BioLabs.

### cDNA sequences

Canonical *Homo sapiens* TAS2R protein sequences as denoted in UniProt were employed, except for TAS2R31 and TAS2R38 for which the WMVI and PAV polymorphism were used, respectively. The protein sequences of the TAS2Rs used in this study are indicated in Supplementary Table 3.

### Construction of multigene expression vectors

Vectors purchased from the MultiBacMam kit (Geneva Biotech) were used to generate multigene vectors. The genes for mt-clytin II and *Homo sapiens* G $\alpha$ 16-gust44 chimera were codon-optimized for expression in human cell lines and synthesized by GenScript. G $\alpha$ 16-gust44 and mt-clytin II were cloned into CAG-promoter based donor vectors bearing the spectinomycin and kanamycin resistance gene, respectively. Each TAS2R gene was modified by replacing the initiator ATG codon with a sequence coding for the appropriate signal sequence, and cloned into the CMV-promoter based acceptor vector bearing the gentamycin resistance gene. The generation of a multigene expression vector was achieved by fusing donor and acceptor vectors using an *in vitro* Cre-*loxP* reaction by following the manufacturer's protocol as described in the MultiBacMam kit (Geneva Biotech). The Cre-*loxP*

reaction mixture was used to transform *E. coli* DH5 $\alpha$  by heat shock, plated onto selection agar plates containing 7  $\mu\text{g mL}^{-1}$  gentamycin, 50  $\mu\text{g mL}^{-1}$  kanamycin, and 100  $\mu\text{g mL}^{-1}$  spectinomycin after a 4 h recovery period, and allowed overnight growth at 37 °C. Several colonies were selected for overnight growth at 37 °C in LB media supplemented with the abovementioned antibiotics to purify their plasmids for restriction enzyme analysis using *Bst*XI. Type 1 and type 2 plasmids can be differentiated based on their distinctive digestion patterns. Two assay controls were used in this study: cells transfected with i) mt-clytin II only, and ii) both G $\alpha$ 16-gust44 and mt-clytin II. Only multigene vectors with single copy integration of each constituent vector were used in this study.

### **Bioluminescence-based intracellular calcium release assay**

293AD (Cell Biolabs, Inc) and AD-293 cells (Agilent) were maintained at 37 °C in a humidified atmosphere of 8% CO<sub>2</sub> and cultured in high-glucose Dulbecco's modified Eagle's medium (Gibco) supplemented with 10% (v/v) heat-inactivated fetal bovine serum (Biowest) and 1% (v/v) penicillin-streptomycin (Gibco). Cells were seeded at a density of 8,400 cells per well in white 384-well tissue culture plates (Greiner) and grown overnight. After 24 h, cells were transiently transfected with 25 ng of the triple gene construct per well using ViaFect (Promega) using a transfection agent to plasmid ratio of 3:1  $\mu\text{L}:\mu\text{g}$ . After 24 h post-transfection, the media in each plate was replaced with 40  $\mu\text{L}$  of 1 $\times$  Hank's Balanced Salt Solution (HBSS) containing 20 mM HEPES pH 7.4 and 10  $\mu\text{M}$  coelenterazine h (AAT Bioquest). The assay plate was incubated at 27 °C in the dark for 4 h. Compound stock solutions were prepared by dissolving compounds in either 1 $\times$  HBSS containing 20 mM HEPES pH 7.4 (buffer A), or dimethyl sulfoxide (DMSO). Ligands dissolved in DMSO were further diluted to the appropriate concentration in buffer A or LB broth, and the final DMSO concentration in the assay did not exceed 0.5% (v/v). The luminescence mode of FLIPR<sup>TETRA</sup> (Molecular Devices) was employed using a gain of 28,000, and an exposure time of 1.5-3.0 s. From the source plate, 12.5  $\mu\text{L}$  of test compound was dispensed into the assay plate. Each interval of luminescence signal measurement spanned 3.1 s, starting with a baseline reading of 3 intervals, and 40 intervals of signal record after ligand addition. The area under the curve (AUC) was computed using ScreenWorks (Molecular Devices), with the third interval serving as the baseline for background subtraction. Data reported were derived from at least two independent experiments

performed in at least duplicates and non-linear regression analysis was performed using the 3-parameter logistic regression model in Prism 7 (GraphPad). Dose-response curves were scaled to zero baseline.

### **Fluorescence-based intracellular calcium release assay**

Experiments were performed as described above for the bioluminescence-based intracellular calcium release assay, except cells were seed in black 384-well tissue culture plates (Greiner). After 24 h post-transfection, the media in each plate was replaced with 40  $\mu$ L of 1 $\times$  Hank's Balanced Salt Solution (HBSS) containing 20 mM HEPES pH 7.4 and 4x dilution of Fluo4 (Thermo Fisher). The assay plate was incubated at 37  $^{\circ}$ C, 8% CO<sub>2</sub> in the dark for 2 h. The fluorescence mode of FLIPR<sup>TETRA</sup> was employed using an excitation of 470-495 nm and emission of 515-575 nm. From the source plate, 12.5  $\mu$ L of test compound was dispensed into the assay plate. Each interval of fluorescence emission signal measurement spanned 0.63 s, starting with a baseline reading of 10 intervals, and 300 intervals of signal record after ligand addition. The difference between the maximum and minimum RFU was used to calculate dose-response curves. Data reported were derived from at least two independent experiments performed in technical quadruplicates and non-linear regression analysis was performed using the 3-parameter logistic regression model in Prism 7 (GraphPad).

### **Cell surface expression HiBiT assay**

A library of TAS2R constructs, containing N-terminal signal sequences from various Class A GPCRs followed by a HiBiT tag flanked by GGGSGGSSSGG and GGS GG GSGGSSSGG linkers, was generated (Supplementary Table 4 and Supplementary Figure 3). Transfection of AD-293 was performed in white 384-well tissue culture plates (Greiner) with 18 ng of each construct using ViaFect (Promega) using a transfection agent to plasmid ratio of 3:1  $\mu$ L: $\mu$ g. After 24 h, the plates were equilibrated to room temperature and the culture media was replaced by the Nano-Glo HiBiT extracellular reagent (Promega), which was prepared according to the manufacturer's protocol. After 10 minutes of incubation with the reagent at room temperature, luminescence signals were measured in a microplate reader using an integration time of 1 sec (EnSpire).

## **Acknowledgements**

We thank Dr. Ann Koay, Dr. Ng Siew Bee, Dr. Nicholas Lindley, and Dr. Hazel Khoo of the Singapore Institute of Food and Biotechnology Innovation for supporting this project.

## **Funding**

This research is supported by the Agency for Science, Technology and Research (A\*STAR) under its IAF-PP: Biotrans Phase 3 Programme (H20H6a0028).

## References

- (1) Roper, S. D., and Chaudhari, N. (2017) Taste buds: Cells, signals and synapses. *Nat. Rev. Neurosci.* *18*, 485–497.
- (2) Lee, S. J., Depoortere, I., and Hatt, H. (2019) Therapeutic potential of ectopic olfactory and taste receptors. *Nat. Rev. Drug Discov.* *18*, 116–138.
- (3) Di Pizio, A., Levitx, A., Slutzki, M., Behrens, M., Karamanjj, R., and Niv, M. Y. (2016) Comparing Class A GPCRs to bitter taste receptors: Structural motifs, ligand interactions and agonist-to-antagonist ratios. *Methods Cell Biol.* Elsevier Ltd.
- (4) Roudnitzky, N., Behrens, M., Engel, A., Kohl, S., Thalmann, S., Hübner, S., Lossow, K., Wooding, S. P., and Meyerhof, W. (2015) Receptor polymorphism and genomic structure interact to shape bitter taste perception. *PLoS Genet.* *11*, 1–25.
- (5) Beckett, E. L., Martin, C., Yates, Z., Veysey, M., Duesing, K., and Lucock, M. (2014) Bitter taste genetics-the relationship to tasting, liking, consumption and health. *Food Funct.* *5*, 3040–3054.
- (6) Brockhoff, A., Behrens, M., Roudnitzky, N., Appendino, G., Avonto, C., and Meyerhof, W. (2011) Receptor agonism and antagonism of dietary bitter compounds. *J. Neurosci.* *31*, 14775–14872.
- (7) Meyerhof, W., Batram, C., Kuhn, C., Brockhoff, A., Chudoba, E., Bufe, B., Appendino, G., and Behrens, M. (2009) The molecular receptive ranges of human TAS2R bitter taste receptors. *Chem. Senses* *35*, 157–170.
- (8) Brockhoff, A., Behrens, M., Massarotti, A., Appending, G., and Meyerhof, W. (2007) Broad tuning of the human bitter taste receptor hTAS2R46 to various sesquiterpene lactones, clerodane and labdane diterpenoids, strychnine, and denatonium. *J. Agric. Food Chem.* *55*, 6236–6243.
- (9) Pydi, S. P., Chakraborty, R., Bhullar, R. P., and Chelikani, P. (2013) Role of rhodopsin N-terminus in structure and function of rhodopsin-bitter taste receptor chimeras. *Biochem. Biophys. Res. Commun.* *430*, 179–182.
- (10) Ueda, T., Ugawa, S., Yamamura, H., Imaizumi, Y., and Shimada, S. (2003) Functional interaction between T2R taste receptors and G-protein  $\alpha$  subunits expressed in taste receptor cells. *J. Neurosci.* *23*, 7376–7380.
- (11) Christensen, J., Nørgaard, L., Bro, R., and Engelsen, S. B. (2006) Multivariate autofluorescence of intact food systems. *Chem. Rev.* *106*, 1979–1994.
- (12) Shimomura, O., Johnson, F. H., and Saiga, Y. (1962) Extraction, purification and properties of aequorin, a bioluminescent protein from the luminous hydromedusan, *Aequorea*. *J. Cell. Comp. Physiol.* *59*, 223–239.
- (13) Inouye, S. (2008) Cloning, expression, purification and characterization of an isotype of clytin, a calcium-binding photoprotein from the luminous hydromedusa *Clytia grearium*. *J. Biochem.* *143*, 711–717.
- (14) Campbell, A. K. (1974) Extraction, partial purification and properties of obelin, the calcium-activated luminescent protein from the hydroid *Obelia geniculata*. *Biochem. J.* *143*, 411–418.
- (15) Ereemeeva, E. V., and Vysotski, E. S. (2019) Exploring bioluminescence function of the  $\text{Ca}^{2+}$ -regulated photoproteins with site-directed mutagenesis. *Photochem. Photobiol.* *95*, 8–23.
- (16) Rizzuto, R., Simpson, A. W. M., Brini, M., and Pozzan, T. (1992) Rapid changes of mitochondrial  $\text{Ca}^{2+}$  revealed by specifically targeted recombinant aequorin. *Nature* *358*, 325–327.
- (17) Maeda, A., Nishimura, S., Kameda, K., Imagawa, T., Shigekawa, M., and

- Barsoumian, E. L. (1996) Generation of cell transfectants expressing cardiac calcium ion channel and calcium indicator protein aequorin. *Anal. Biochem.* 242, 31–39.
- (18) Sheu, Y. A., Kricka, L. J., and Pritchett, D. B. (1993) Measurement of intracellular calcium using bioluminescent aequorin expressed in human cells. *Anal. Biochem.* 209, 343–347.
- (19) Toda, Y., Okada, S., and Misaka, T. (2011) Establishment of a new cell-based assay to measure the activity of sweeteners in fluorescent food extracts. *J. Agric. Food Chem.* 59, 12131–12138.
- (20) Rizzuto, R., Brini, M., Murgia, M., and Pozzan, T. (1993) Microdomains with high  $Ca^{2+}$  close to  $IP_3$ -sensitive channels that are sensed by neighboring mitochondria. *Science* 262, 744–747.
- (21) Rizzuto, R., Pinton, P., Carrington, W., Fay, F. S., Kevin, E., Rizzuto, R., Pinton, P., Carrington, W., Fay, F. S., Fogarty, K. E., Lifshitz, L. M., Tuft, R. A., and Pozzan, T. (2018) Close contacts with the endoplasmic reticulum as determinants of mitochondrial  $Ca^{2+}$  responses. *Science* 280, 1763–1766.
- (22) Dupriez, V. J., Maes, K., Le Poul, E., Burgeon, E., and Detheux, M. (2002) Aequorin-based functional assays for G-protein-coupled receptors, ion channels, and tyrosine kinase receptors. *Recept. Channels* 8, 319–330.
- (23) Kriz, A., Schmid, K., Baumgartner, N., Ziegler, U., Berger, I., Ballmer-Hofer, K., and Berger, P. (2010) A plasmid-based multigene expression system for mammalian cells. *Nat. Commun.* 1, 120–126.
- (24) Underhill, M. F., Smales, C. M., Naylor, L. H., Birch, J. R., and James, D. C. (2007) Transient gene expression levels from multigene expression vectors. *Biotechnol. Prog.* 23, 435–443.
- (25) Hellfritsch, C., Brockho, A., Sta, F., Meyerhof, W., and Hofmann, T. (2012) Human psychometric and taste receptor responses to steviol glycosides. *J. Agric. Food Chem.* 60, 6781–6793.
- (26) Soares, S., Silva, M. S., García-Estevez, I., Großmann, P., Brás, N., Brandão, E., Mateus, N., De Freitas, V., Behrens, M., and Meyerhof, W. (2018) Human bitter taste receptors are activated by different classes of polyphenols. *J. Agric. Food Chem.* 66, 8814–8823.
- (27) Wang, Y., Zajac, A. L., Lei, W., Christensen, C. M., Margolskee, R. F., Bouysset, C., Golebiowski, J., Zhao, H., Fiorucci, S., and Jiang, P. (2019) Metal ions activate the human taste receptor TAS2R7. *Chem. Senses* 44, 339–347.
- (28) Behrens, M., Redel, U., Blank, K., and Meyerhof, W. (2019) The human bitter taste receptor TAS2R7 facilitates the detection of bitter salts. *Biochem. Biophys. Res. Commun.* 512, 877–881.
- (29) Fotsing, J. R., Darmohusodo, V., Patron, A. P., Ching, B. W., Brady, T., Arellano, M., Chen, Q., Davis, T. J., Liu, H., Servant, G., Zhang, L., Williams, M., Saganich, M., Ditschun, T., Tachdjian, C., and Karanewsky, D. S. (2020) Discovery and development of S6821 and S7958 as potent TAS2R8 antagonists. *J. Med. Chem.* 63, 4957–4977.
- (30) Dotson, C. D., Zhang, L., Xu, H., Shin, Y. K., Vignes, S., Ott, S. H., Elson, A. E. T., Choi, H. J., Shaw, H., Egan, J. M., Mitchell, B. D., Li, X., Steinle, N. I., and Munger, S. D. (2008) Bitter taste receptors influence glucose homeostasis. *PLoS One* 3, e3974.
- (31) Di Pizio, A., Waterloo, L. A. W., Brox, R., Löber, S., Weikert, D., Behrens, M., Gmeiner, P., and Niv, M. Y. (2020) Rational design of agonists for bitter taste receptor TAS2R14: from modeling to bench and back. *Cell. Mol. Life Sci.* 77, 531–542.

- (32) Yamazaki, T., Narukawa, M., Mochizuki, M., Misaka, T., and Watanabe, T. (2013) Activation of the hTAS2R14 human bitter-taste receptor by (-)-epigallocatechin gallate and (-)-epicatechin gallate. *Biosci. Biotechnol. Biochem.* *77*, 1981–1983.
- (33) Nowak, S., Di Pizio, A., Levit, A., Niv, M. Y., Meyerhof, W., and Behrens, M. (2018) Reengineering the ligand sensitivity of the broadly tuned human bitter taste receptor TAS2R14. *Biochim. Biophys. Acta - Gen. Subj.* *1862*, 2162–2173.
- (34) Behrens, M., Brockhoff, A., Kuhn, C., Bufe, B., Winnig, M., and Meyerhof, W. (2004) The human taste receptor hTAS2R14 responds to a variety of different bitter compounds. *Biochem. Biophys. Res. Commun.* *319*, 479–485.
- (35) Soranzo, N., Bufe, B., Sabeti, P. C., Wilson, J. F., Weale, M. E., Marguerie, R., Meyerhof, W., and Goldstein, D. B. (2005) Positive selection on a high-sensitivity allele of the human bitter-taste receptor TAS2R16. *Curr. Biol.* *15*, 1257–1265.
- (36) Bufe, B., Hofmann, T., Krautwurst, D., Raguse, J. D., and Meyerhof, W. (2002) The human TAS2R16 receptor mediates bitter taste in response to  $\beta$ -glucopyranosides. *Nat. Genet.* *32*, 397–401.
- (37) Thomas, A., Sulli, C., Davidson, E., Berdougo, E., Phillips, M., Puffer, B. A., Paes, C., Doranz, B. J., and Rucker, J. B. (2017) The bitter taste receptor TAS2R16 achieves high specificity and accommodates diverse glycoside ligands by using a two-faced binding pocket. *Sci. Rep.* *7*, 1–15.
- (38) Kim, M. J., Son, H. J., Kim, Y., Misaka, T., and Rhyu, M. R. (2015) Umami-bitter interactions: The suppression of bitterness by umami peptides via human bitter taste receptor. *Biochem. Biophys. Res. Commun.* *456*, 586–590.
- (39) Greene, T. A., Alarcon, S., Thomas, A., Berdougo, E., Doranz, B. J., Breslin, P. A. S., and Rucker, J. B. (2011) Probenecid inhibits the human bitter taste receptor TAS2R16 and suppresses bitter perception of salicin. *PLoS One* *6*, e20123.
- (40) Sakurai, T., Misaka, T., Ishiguro, M., Masuda, K., Sugawara, T., Ito, K., Kobayashi, T., Matsuo, S., Ishimaru, Y., Asakura, T., and Abe, K. (2010) Characterization of the  $\beta$ -D-glucopyranoside binding site of the human bitter taste receptor hTAS2R16. *J. Biol. Chem.* *285*, 28373–28378.
- (41) Ji, M., Su, X., Su, X., Chen, Y., Huang, W., Zhang, J., Gao, Z., Li, C., and Lu, X. (2014) Identification of novel compounds for human bitter taste receptors. *Chem. Biol. Drug Des.* *84*, 63–74.
- (42) Jaggupilli, A., Singh, N., De Jesus, V. C., Gounni, M. S., Dhanaraj, P., and Chelikani, P. (2019) Chemosensory bitter taste receptors (T2Rs) are activated by multiple antibiotics. *FASEB J.* *33*, 501–517.
- (43) Kuhn, C., Bufe, B., Winnig, M., Hofmann, T., Frank, O., Behrens, M., Lewtschenko, T., Slack, J. P., Ward, C. D., and Meyerhof, W. (2004) Bitter taste receptors for saccharin and acesulfame K. *J. Neurosci.* *24*, 10260–10265.
- (44) Slack, J. P., Brockhoff, A., Batram, C., Menzel, S., Sonnabend, C., Born, S., Galindo, M. M., Kohl, S., Thalmann, S., Ostopovici-Halip, L., Simons, C. T., Ungureanu, I., Duineveld, K., Bologna, C. G., Behrens, M., Furrer, S., Oprea, T. I., and Meyerhof, W. (2010) Modulation of bitter taste perception by a small molecule hTAS2R antagonist. *Curr. Biol.* *20*, 1104–1109.
- (45) Pronin, A. N., Xu, H., Tang, H., Zhang, L., Li, Q., and Li, X. (2007) Specific alleles of bitter receptor genes influence human sensitivity to the bitterness of aloin and saccharin. *Curr. Biol.* *17*, 1403–1408.
- (46) Behrens, M., Gunn, H. C., Ramos, P. C. M., Meyerhof, W., and Wooding, S. P. (2013) Genetic, functional, and phenotypic diversity in TAS2R38-mediated bitter taste perception. *Chem. Senses* *38*, 475–484.



- (47) Sandau, M. M., Goodman, J. R., Thomas, A., Rucker, J. B., and Rawson, N. E. (2015) A functional comparison of the domestic cat bitter receptors Tas2r38 and Tas2r43 with their human orthologs. *BMC Neurosci.* 16, 1–11.
- (48) Yamazaki, T., Sagisaka, M., Ikeda, R., Nakamura, T., Matsuda, N., Ishii, T., Nakayama, T., and Watanabe, T. (2014) The human bitter taste receptor hTAS2R39 is the primary receptor for the bitterness of theaflavins. *Biosci. Biotechnol. Biochem.* 78, 1753–1756.
- (49) Roland, W. S. U., Van Buren, L., Gruppen, H., Driesse, M., Gouka, R. J., Smit, G., and Vincken, J. P. (2013) Bitter taste receptor activation by flavonoids and isoflavonoids: Modeled structural requirements for activation of hTAS2R14 and hTAS2R39. *J. Agric. Food Chem.* 61, 10454–10466.
- (50) Narukawa, M., Noga, C., Ueno, Y., Sato, T., Misaka, T., and Watanabe, T. (2011) Evaluation of the bitterness of green tea catechins by a cell-based assay with the human bitter taste receptor hTAS2R39. *Biochem. Biophys. Res. Commun.* 405, 620–625.
- (51) Suess, B., Brockhoff, A., Meyerhof, W., and Hofmann, T. (2018) The odorant (R)-citronellal attenuates caffeine bitterness by inhibiting the bitter receptors TAS2R43 and TAS2R46. *J. Agric. Food Chem.* 66, 2301–2311.
- (52) Brockhoff, A., Behrens, M., Niv, M. Y., and Meyerhof, W. (2010) Structural requirements of bitter taste receptor activation. *Proc. Natl. Acad. Sci. U. S. A.* 107, 11110–11115.
- (53) Kuroda, Y., Ikeda, R., Yamazaki, T., Ito, K., Uda, K., Wakabayashi, K., and Watanabe, T. (2016) Activation of human bitter taste receptors by polymethoxylated flavonoids. *Biosci. Biotechnol. Biochem.* 80, 2014–2017.
- (54) Schwinn, M. K., Machleidt, T., Zimmerman, K., Eggers, C. T., Dixon, A. S., Hurst, R., Hall, M. P., Encell, L. P., Binkowski, B. F., and Wood, K. V. (2018) CRISPR-mediated tagging of endogenous proteins with a luminescent peptide. *ACS Chem. Biol.* 13, 467–474.
- (55) Saito, H., Kubota, M., Roberts, R. W., Chi, Q., and Matsunami, H. (2004) RTP family members induce functional expression of mammalian odorant receptors. *Cell* 119, 679–691.
- (56) Behrens, M., Bartelt, J., Reichling, C., Winnig, M., Kuhn, C., and Meyerhof, W. (2006) Members of RTP and REEP gene families influence functional bitter taste receptor expression. *J. Biol. Chem.* 281, 20650–20659.
- (57) Dunham, J. H., and Hall, R. A. (2009) Enhancement of the surface expression of G protein-coupled receptors. *Trends Biotechnol.* 27, 541–545.
- (58) Deslauriers, B., Ponce, C., Lombard, C., Languier, R., Bonnafous, J. C., and Marie, J. (1999) N-glycosylation requirements for the AT1a angiotensin II receptor delivery to the plasma membrane. *Biochem. J.* 339, 397–405.
- (59) Kaushal, S., Ridge, K. D., and Khorana, H. G. (1994) Structure and function in rhodopsin: The role of asparagine-linked glycosylation. *Proc. Natl. Acad. Sci. U. S. A.* 91, 4024–4028.
- (60) Garcia Rodriguez, C., Cundell, D. R., Tuomanen, E. I., Kolakowski, L. F., Gerard, C., and Gerard, N. P. (1995) The role of N-glycosylation for functional expression of the human platelet-activating factor receptor. Glycosylation is required for efficient membrane trafficking. *J. Biol. Chem.* 270, 25178–25184.
- (61) Michineau, S., Muller, L., Pizard, A., Alhenc-Gélas, F., and Rajerison, R. M. (2004) N-linked glycosylation of the human bradykinin B2 receptor is required for optimal cell-surface expression and coupling. *Biol. Chem.* 385, 49–57.
- (62) Zhong, X., Kriz, R., Seehra, J., and Kumar, R. (2004) N-linked glycosylation of

platelet P<sub>2</sub>Y<sub>12</sub> ADP receptor is essential for signal transduction but not for ligand binding or cell surface expression. *FEBS Lett.* 562, 111–117.

(63) Chen, Q., Miller, L. J., and Dong, M. (2010) Role of N-linked glycosylation in biosynthesis, trafficking, and function of the human glucagon-like peptide 1 receptor. *Am. J. Physiol. - Endocrinol. Metab.* 299, 62–68.

(64) Gonzalez de Valdivia, E., Sandén, C., Kahn, R., Olde, B., and Leeb-Lundberg, L. M. F. (2019) Human G protein-coupled receptor 30 is N-glycosylated and N-terminal domain asparagine 44 is required for receptor structure and activity. *Biosci. Rep.* 39.

(65) Katada, S., Tanaka, M., and Touhara, K. (2004) Structural determinants for membrane trafficking and G protein selectivity of a mouse olfactory receptor. *J. Neurochem.* 90, 1453–1463.

(66) He, J., Xu, J., Castleberry, A. M., Lau, A. G., and Hall, R. A. (2002) Glycosylation of  $\beta_1$ -adrenergic receptors regulates receptor surface expression and dimerization. *Biochem. Biophys. Res. Commun.* 297, 565–572.

(67) Min, C., Zheng, M., Zhang, X., Guo, S., Kwon, K. J., Shin, C. Y., Kim, H. S., Cheon, S. H., and Kim, K. M. (2015) N-linked glycosylation on the N-terminus of the dopamine D<sub>2</sub> and D<sub>3</sub> receptors determines receptor association with specific microdomains in the plasma membrane. *Biochim. Biophys. Acta - Mol. Cell Res.* 1853, 41–51.

(68) Molinari, M., and Helenius, A. (2000) Chaperone selection during glycoprotein translocation into the endoplasmic reticulum. *Science* 288, 331–333.

(69) Reichling, C., Meyerhof, W., and Behrens, M. (2008) Functions of human bitter taste receptors depend on N-glycosylation. *J. Neurochem.* 106, 1138–1148.

(70) Kohno, T., and Igarashi, Y. (2004) Roles for N-glycosylation in the dynamics of Edg-1/S1P1 in sphingosine 1-phosphate-stimulated cells. *Glycoconj. J.* 21, 497–501.
